# Supplementary material
Source: Springer Nature journal article supplement (https://www.springermedizin.de/resource/supplementary/12936_2010_1600_MOESM6_ESM.pdf/9541666)

rat 1

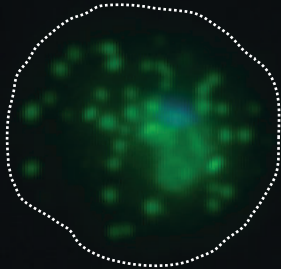

rat 2

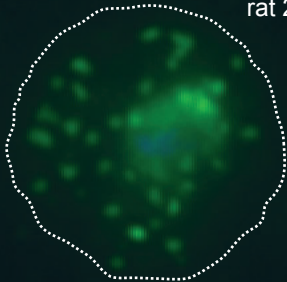

rat 3

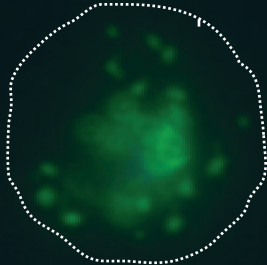

Supplement: MOESM6 [file 9541666]
